# Supplementary material for: An efficient catalytic synthesis and characterization of new styryl-ferrocenes and their trans-π-conjugated organosilicon materials
Source: Royal Society of Chemistry journal article supplement (doi:10.1039/c6ra00859c), 2016-01-01

## Electronic Supplementary Information

### An efficient catalytic synthesis and characterization of new styryl-ferrocenes and their *trans*- $\pi$ -conjugated organosilicon materials

M. Majchrzak<sup>a\*</sup>, S. Kostera<sup>a</sup>, M. Grzelak<sup>a</sup>, B. Marciniec<sup>\*a,b</sup> and M. Kubicki<sup>a</sup>

<sup>a</sup>Faculty of Chemistry, Adam Mickiewicz University in Poznan, Umultowska 89b, 61-614 Poznan, Poland

<sup>b</sup>Center for Advanced Technology, Adam Mickiewicz University in Poznan, Umultowska 89c, 61-614 Poznan, Poland

#### Table of contents

- I. Synthesis procedure of palladium complex
- II. X-Ray structure determination
- III. MS spectra
- IV. GPC chromatograms
- V. NMR Spectra

#### Procedure for the synthesis of Palladium(0) Complex

The title compound was synthesized according to the new procedure presented below.

*Bis(tris(o-tolyl)phosphine)(dibenzylideneacetone)palladium(0)* –  $[\text{Pd}(\eta^2\text{-dba})(\text{P}(\text{o-tolyl})_3)_2]^{32}$  (**3**):  
 $\text{Pd}(\text{dba})_2$  (0.3 g,  $5.22 \times 10^{-4}$  mol), tris(*o*-tolyl)phosphine (0.321 g,  $1.054 \times 10^{-3}$  mol) were placed in a Schlenk flask (25 mL) and degassed for one minute. Afterwards, 4 mL toluene (0.125M) was introduced into vigorously stirred solids of substrates and the final mixture was left for 8h at room temperature to give a yellow-orange solution. The excess of the solvent was evaporated under reduced pressure. The procedure was followed by the addition of hexane. As a result a yellow-orange precipitate was observed. Next, the precipitate was filtered ('canula' system), washed with cold hexane (4 x 10 mL) and dried in vacuum for 2h. The crude product was obtained with 93% (460 mg, yellow-orange solid) yield. Elemental analyses calcd. for  $\text{C}_{60}\text{H}_{58}\text{OP}_2\text{Pd}$ : C 74.80, H 6.07; found C 74.78, H 6.06.

## X-Ray structure determination

Excalibur four-circle diffractometer with Eos CCD-detector, using MoK $\alpha$  radiation source ( $\lambda = 0.7107$  Å). The data was corrected for Lorentz-polarization as well as for absorption effects.<sup>38</sup> Accurate unit-cell parameters were determined by a least-squares fit of 1984 reflections of highest intensity, chosen from the whole experiment. The structures were solved with SIR92<sup>39</sup> and refined with the full-matrix least-squares procedure on  $F^2$  by SHELXL97.<sup>40</sup> All non-hydrogen atoms were refined anisotropically. The hydrogen atoms were placed geometrically, in idealized positions, and refined as rigid groups with their  $U_{iso}$ 's as 1.2 times  $U_{eq}$  of the appropriate carrier atom. Crystallographic data (excluding structure factors) for the structural analysis has been deposited with the Cambridge Crystallographic Data Centre, No. CCDC 974168. Copies of this information may be obtained free of charge from: The Director, CCDC, 12 Union Road, Cambridge, CB2 1EZ, UK. Fax: +44(1223)336-033, e-mail:deposit@ccdc.cam.ac.uk, or www: www.ccdc.cam.ac.uk.

## Notes and references

38 Agilent Technologies 2010. CrysAlis PRO (Version 1.171.35.4).

39 A. Altomare, G. Cascarano, C. A. Giacovazzo, A. Gualardi, *J. Appl. Cryst.* 1993, **26**, 343-350.

40 G. M. Sheldrick, *Acta Cryst.* 2008, **A64**, 112-122.

## MS spectra

MS (m/z) spectra of **1<sup>d</sup>** catalytic system (from Figure 1)

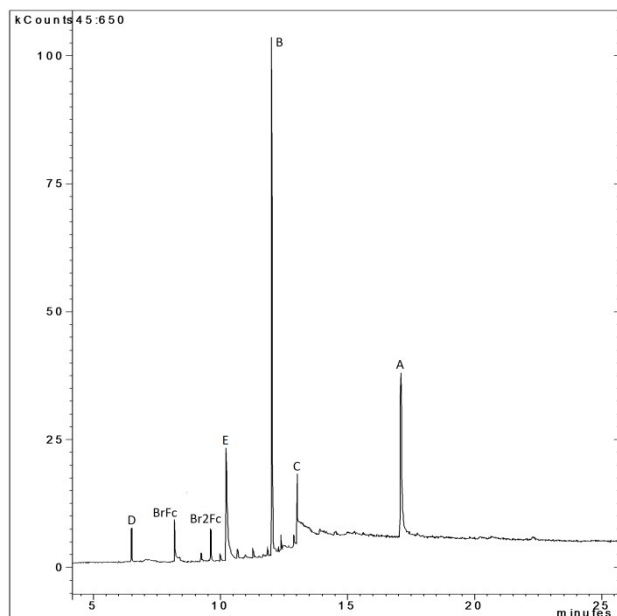

Figure 5. Sample of MS spectrum of **1<sup>d</sup>** catalytic system.

**10 (A)** – 1,1'-bis(4-vinylphenyl)ferrocene

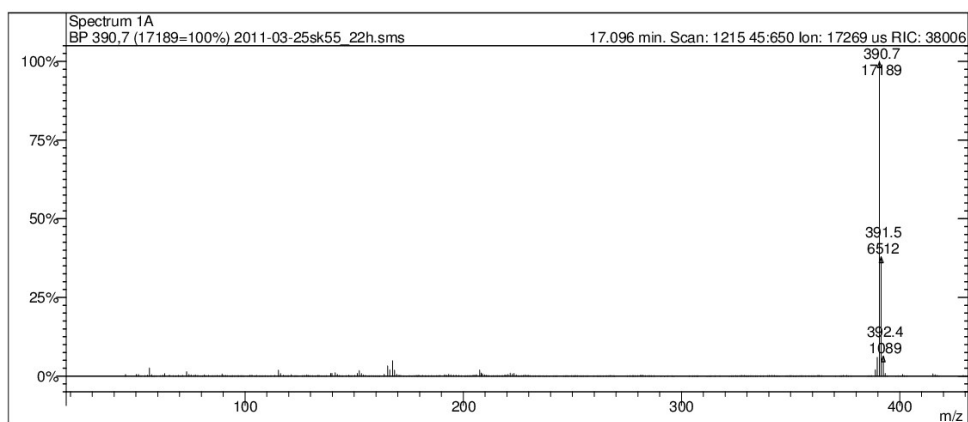

**8 (B)** – 1-(4-vinylphenyl)ferrocene

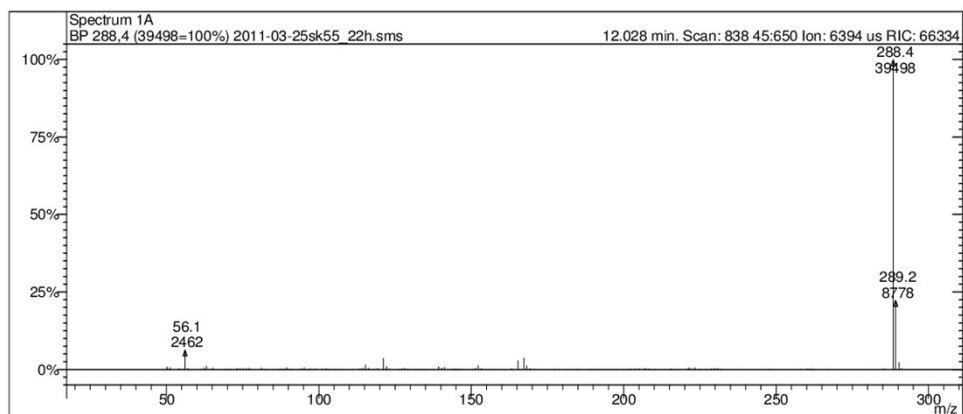

### C – 1-(4-vinylphenyl)-1'-bromo-ferrocene

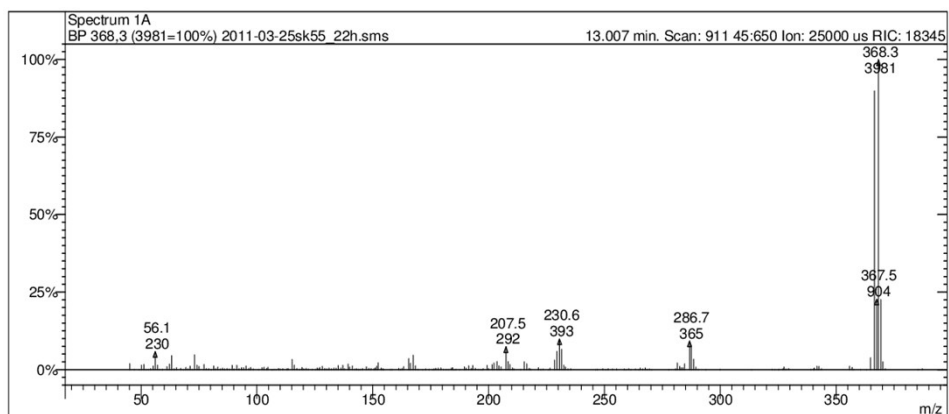

### D - ferrocene

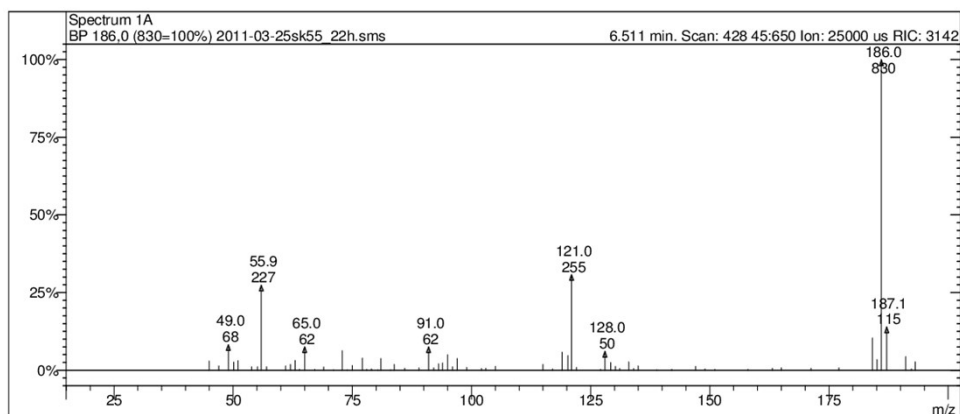

### E – 4,4'-divinylbiphenyl

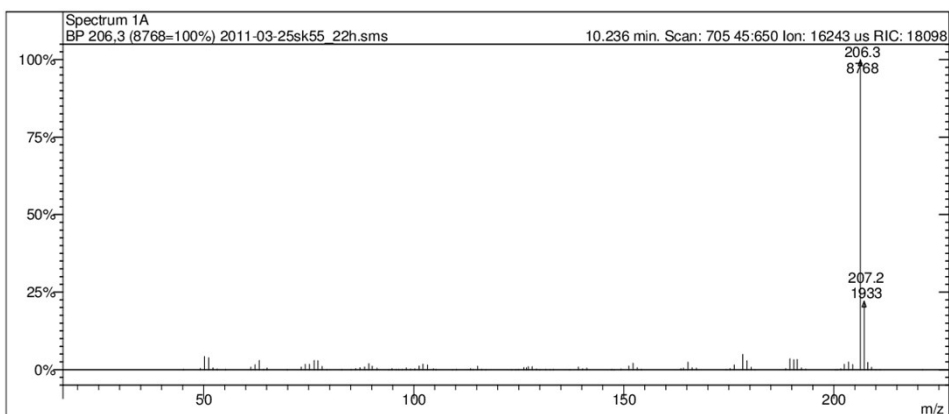

### BrFc – 1-bromoferrocene

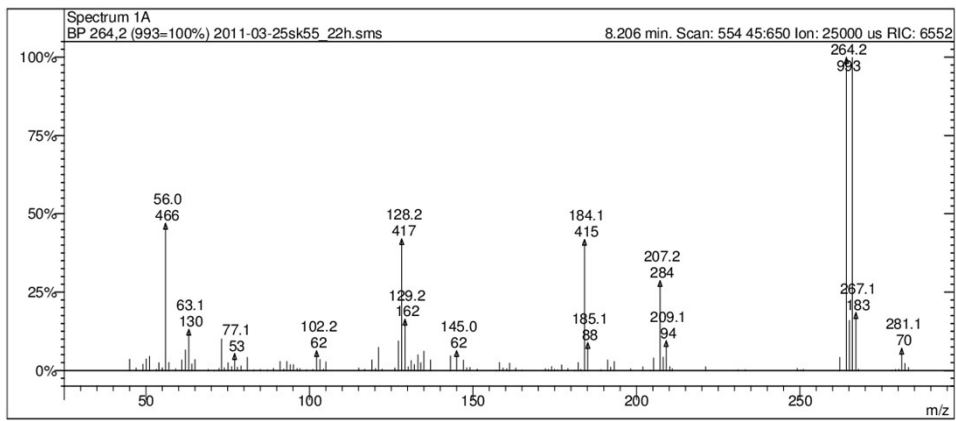

### Br2Fc – 1,1'-dibromoferrocene

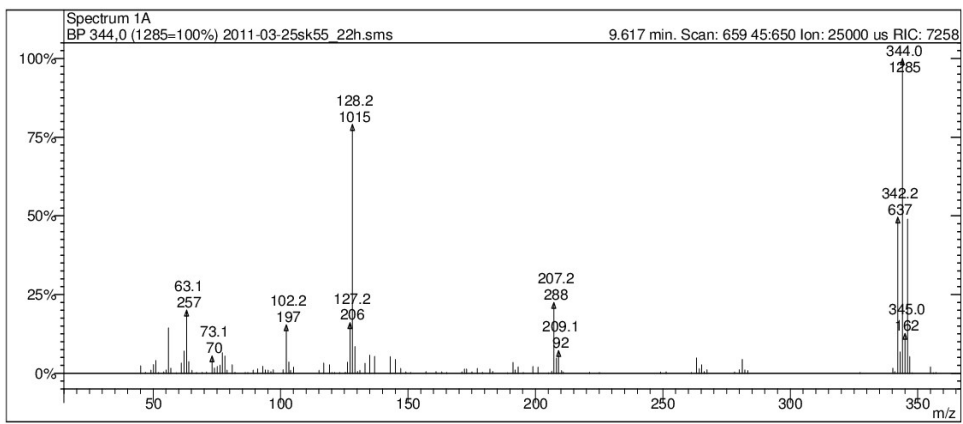

## GPC chromatograms

*GPC graphs of copolymers P1 and P2*

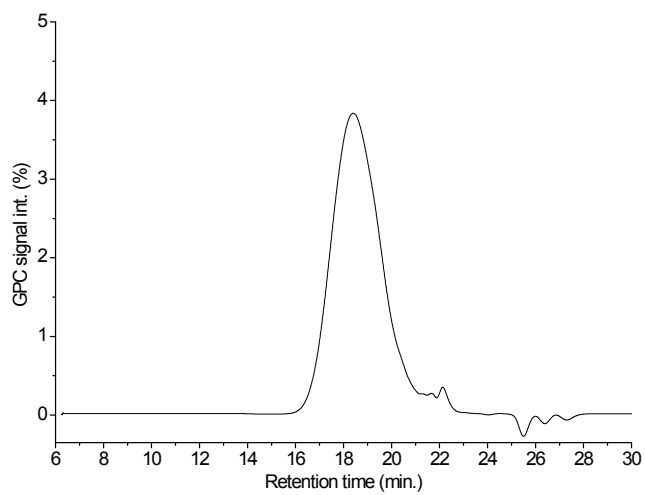

**Figure 6.** GPC chromatogram of copolymer **P1**.

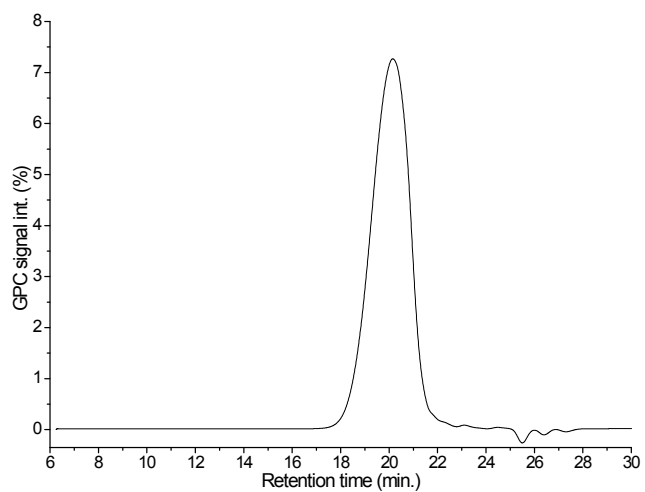

**Figure 7.** GPC chromatogram of copolymer **P2**.

# NMR Spectra

## Compound 7 $^1\text{H}$ NMR

$^1\text{H}$ NMR in  $\text{CDCl}_3$  at 25oC Compound 7

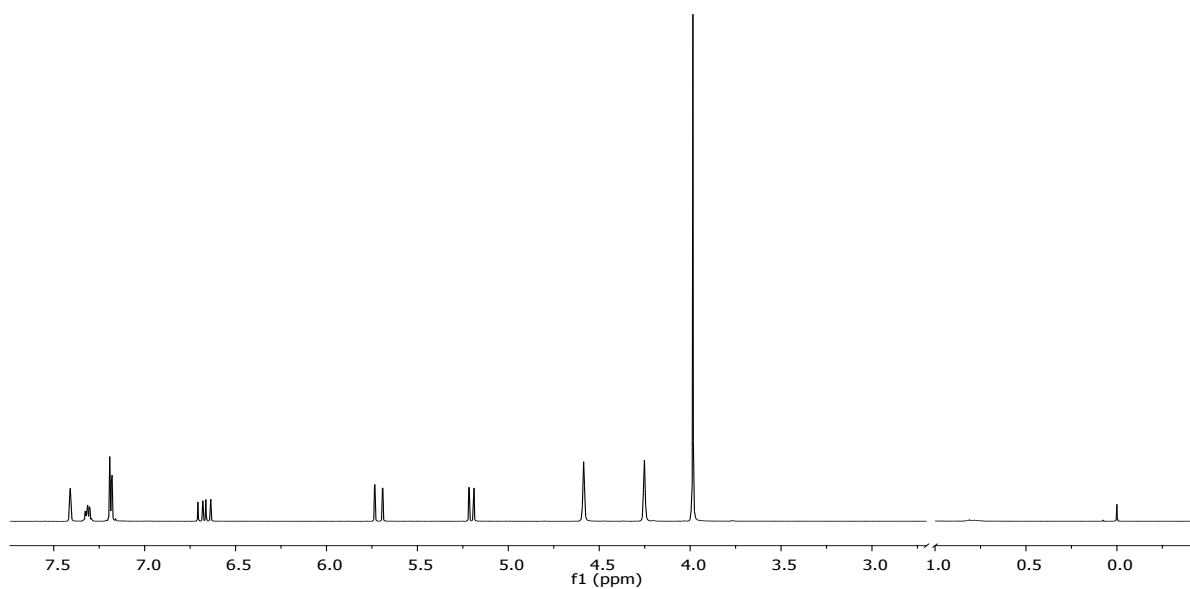

## Compound 7 $^{13}\text{C}$ NMR

$^{13}\text{C}$ NMR in  $\text{CDCl}_3$  at 25oC Compound 7

$^{13}\text{C}$ NMR in  $\text{CDCl}_3$  at 25oC Compound 7

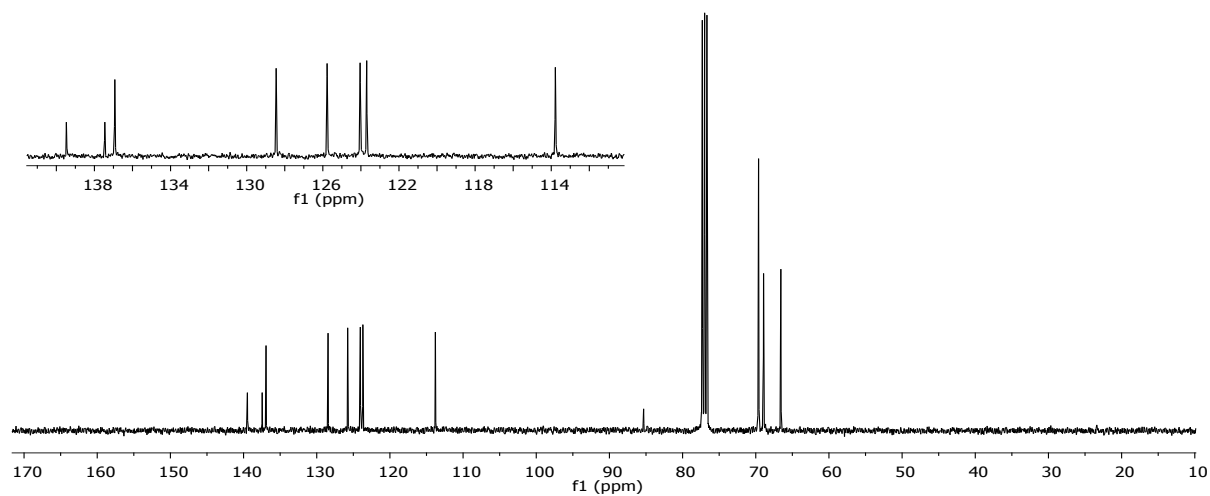

## Compound **8** $^1\text{H}$ NMR

$^1\text{H}$ NMR in  $\text{CDCl}_3$  at 25oC Compound **8**

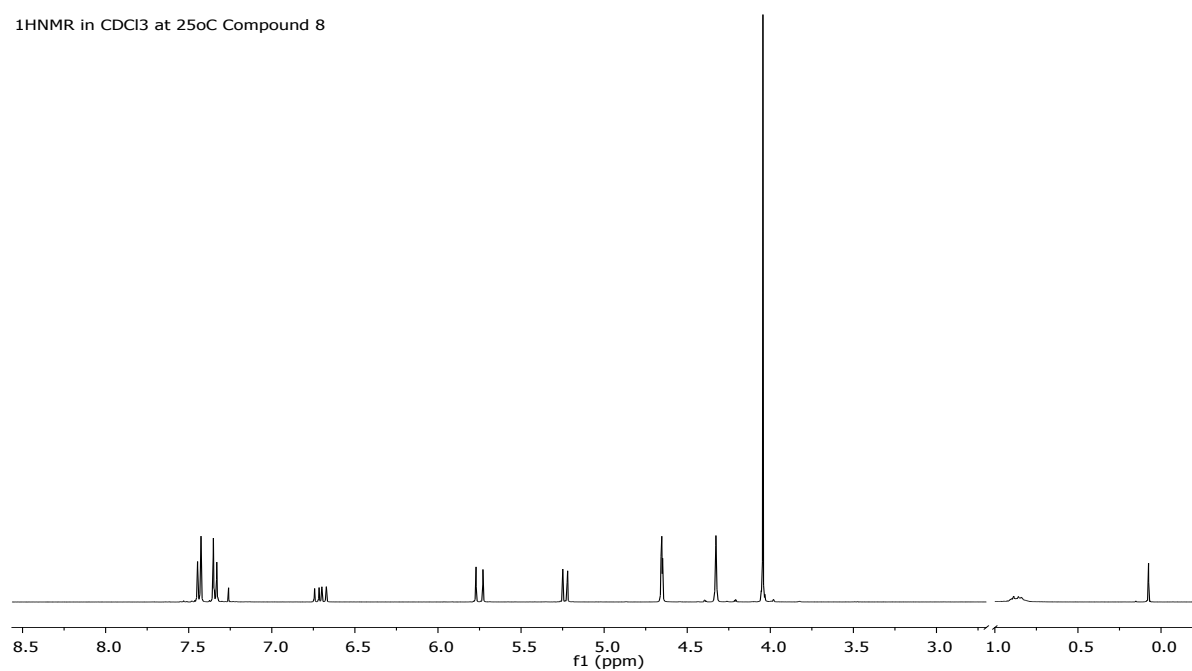

## Compound **8** $^{13}\text{C}$ NMR

$^{13}\text{C}$ NMR in  $\text{CDCl}_3$  at 25oC Compound **8**

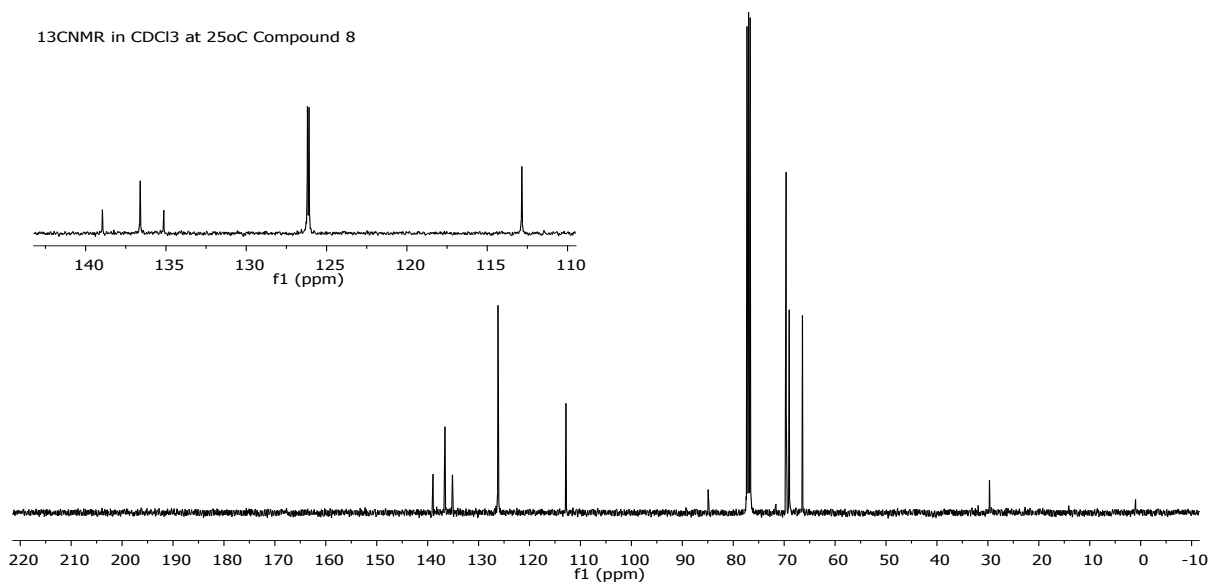



## Compound **9** $^1\text{H}$ NMR (presence in the Article)

## Compound **9** $^{13}\text{C}$ NMR

$^{13}\text{C}$ NMR in  $\text{CDCl}_3$  at 25oC Compound 9

$^{13}\text{C}$ NMR in  $\text{CDCl}_3$  at 25oC Compound 9

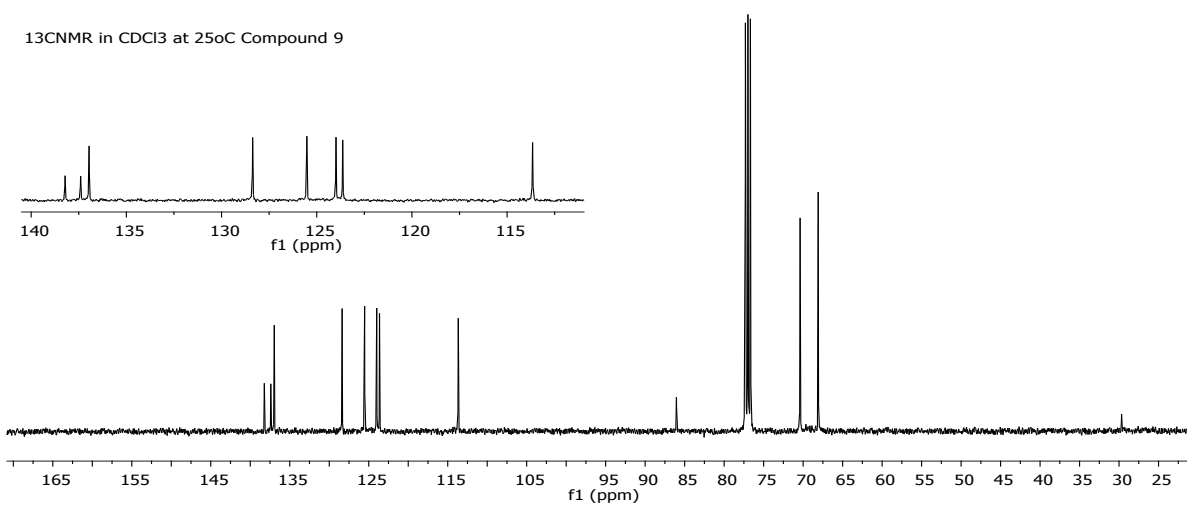

## Compound **10** $^1\text{H}$ NMR

$^1\text{H}$ NMR in  $\text{CDCl}_3$  at 25oC Compound 10

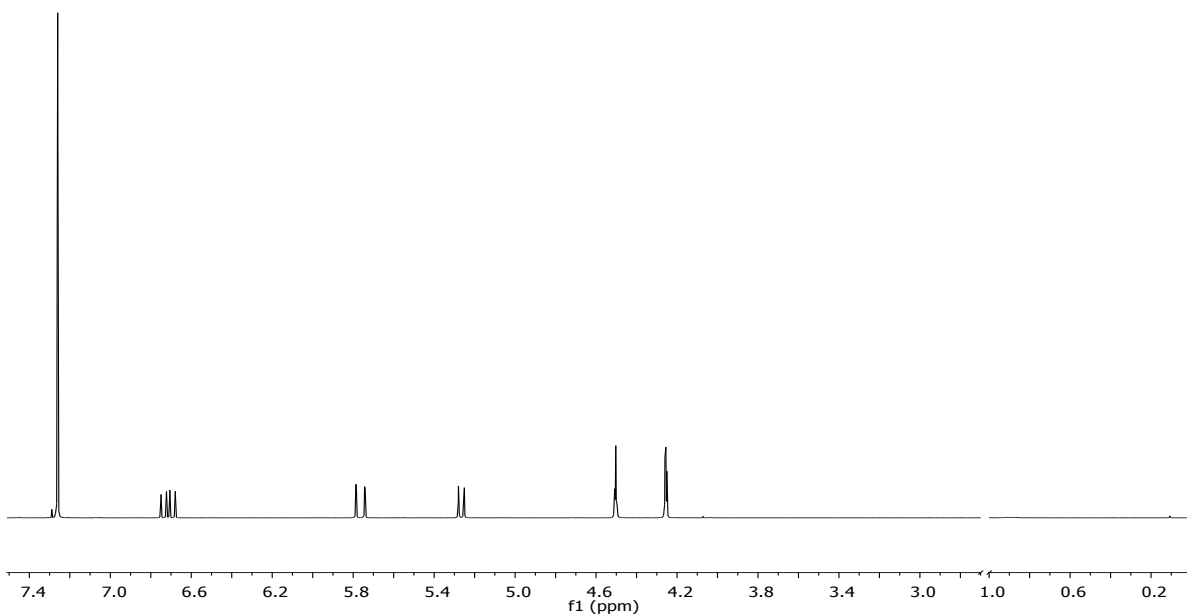

## Compound **10** $^{13}\text{C}$ NMR

$^{13}\text{C}$ NMR in  $\text{CDCl}_3$  at 25°C Compound 10

$^{13}\text{C}$ NMR in  $\text{CDCl}_3$  at 25°C Compound 10

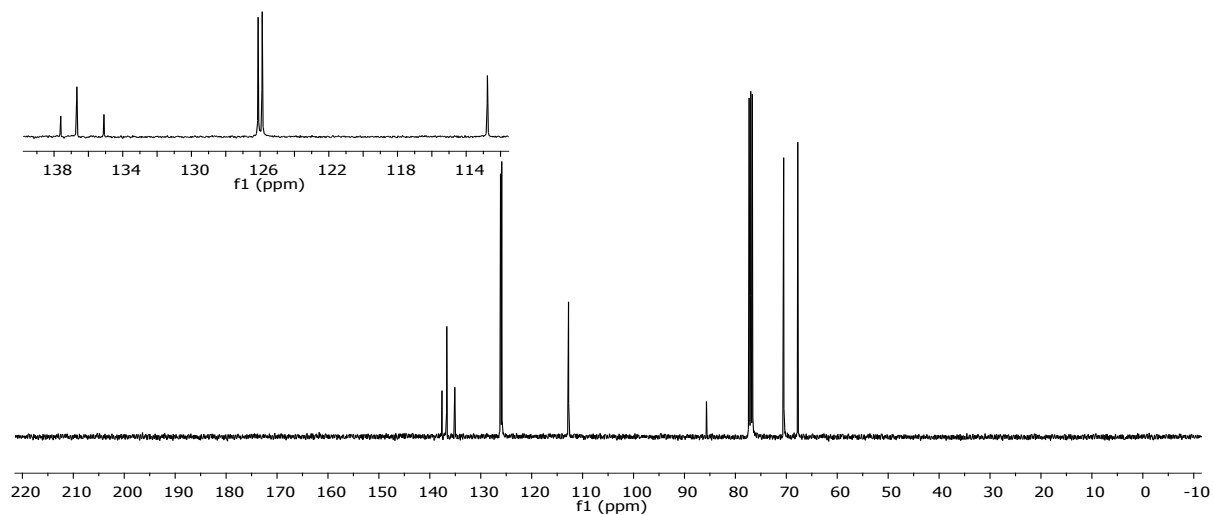

## Compound **11** $^1\text{H}$ NMR

$^1\text{H}$ NMR in  $\text{CDCl}_3$  at 25°C Compound 11

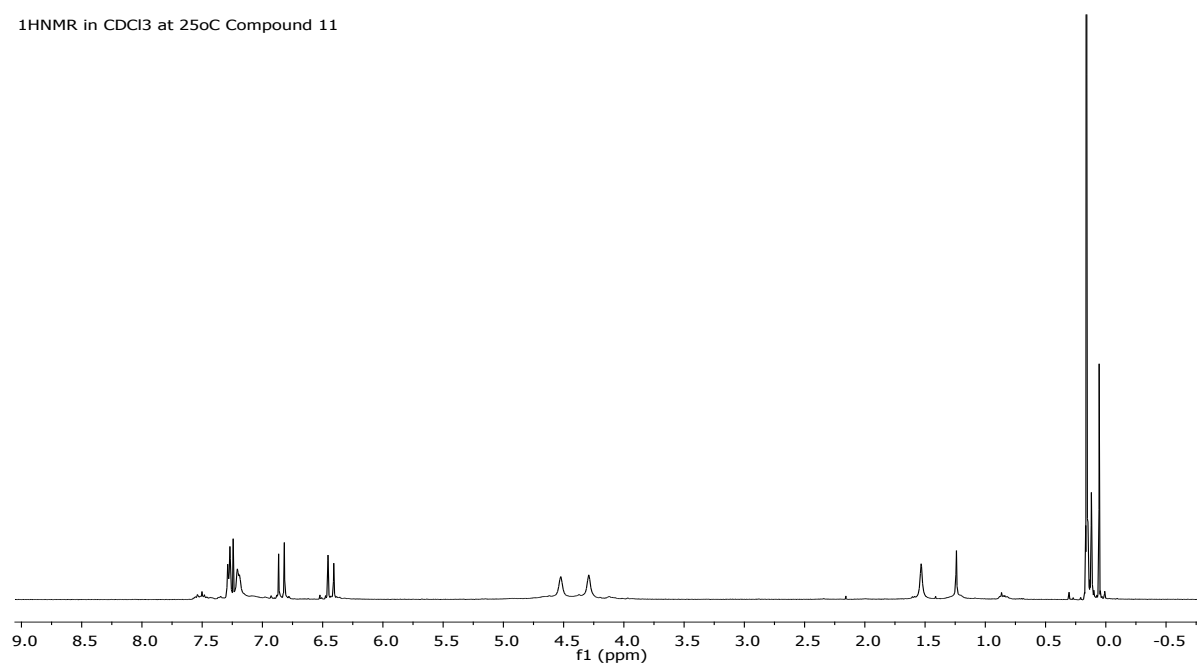

## Compound **11** $^{13}\text{C}$ NMR

$^{13}\text{C}$ NMR in  $\text{CDCl}_3$  at 25oC Compound 11

$^{13}\text{C}$ NMR in  $\text{CDCl}_3$  at 25oC Compound 11

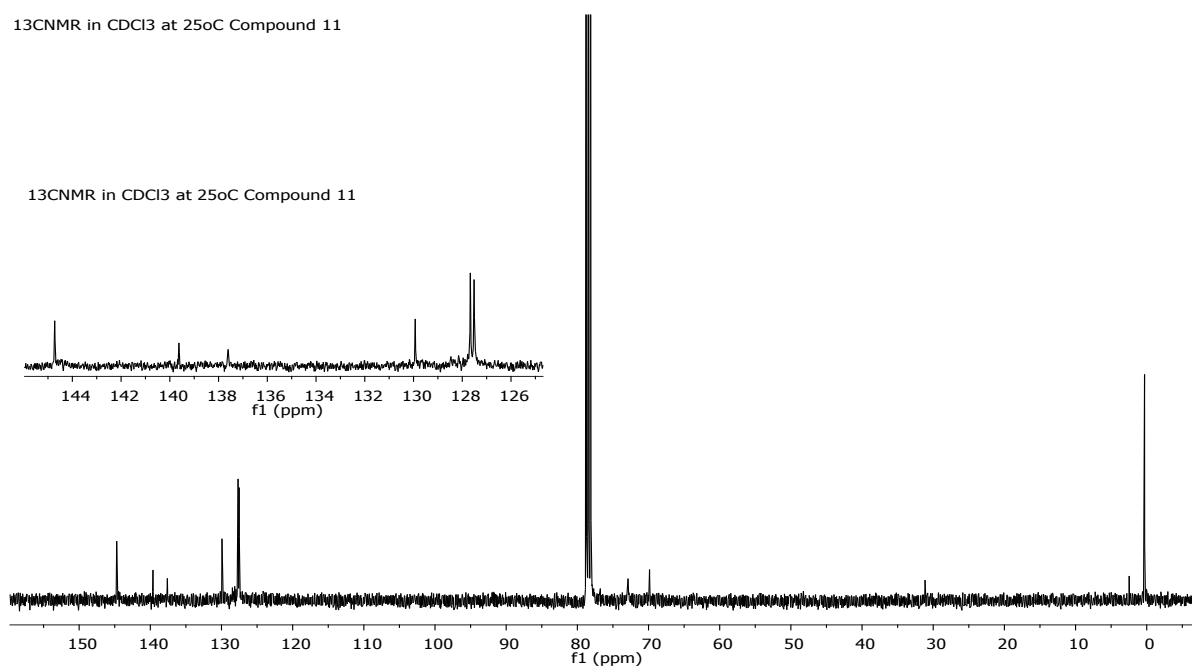

## Compound **11** $^{29}\text{Si}$ NMR

$^{29}\text{Si}$ NMR in  $\text{CDCl}_3$  at 25oC compound 11

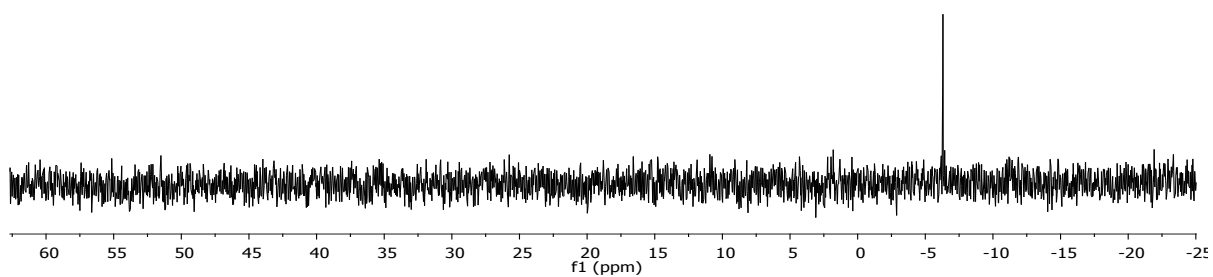

## Compound **12** $^1\text{H}$ NMR

$^1\text{H}$  NMR in  $\text{CDCl}_3$  at 25°C Compound 12

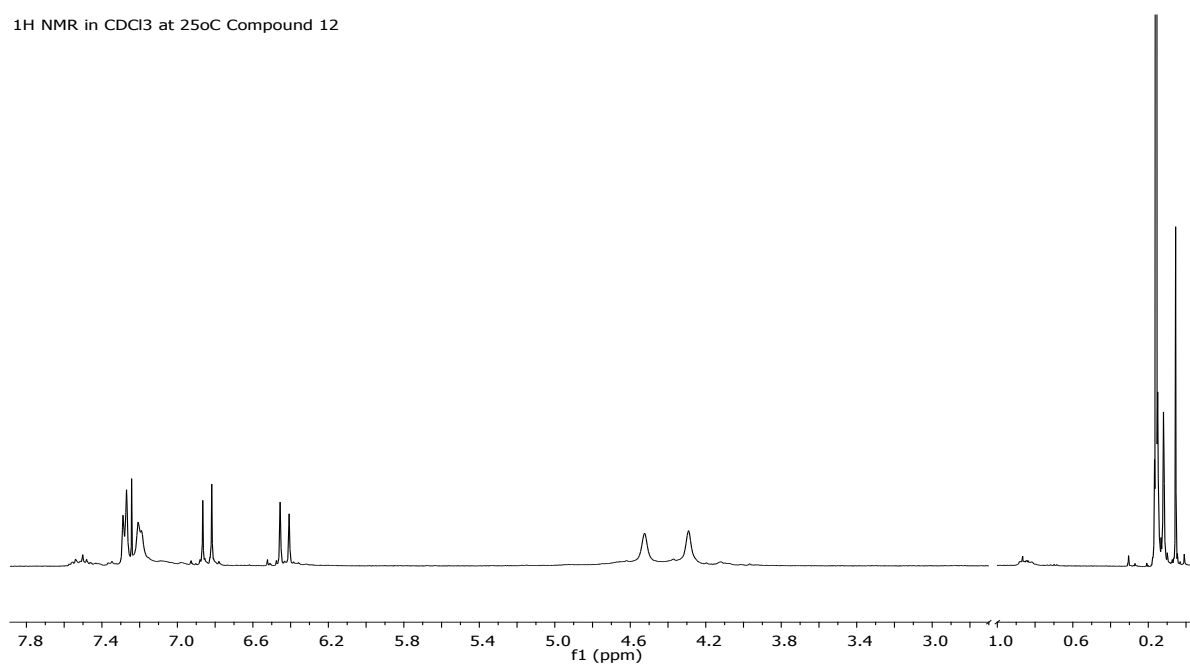

## Compound **12** $^{13}\text{C}$ NMR

$^{13}\text{C}$ NMR in  $\text{CDCl}_3$  at 25°C Compound 12

$^{13}\text{C}$ NMR in  $\text{CDCl}_3$  at 25°C Compound 12

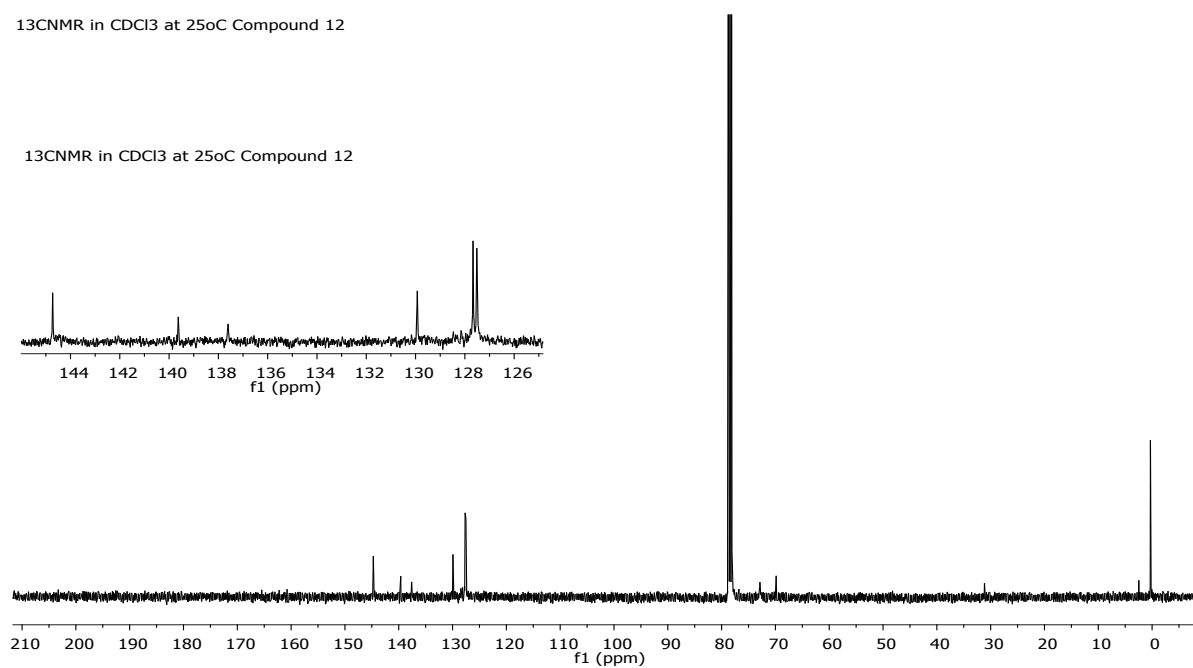

## Compound **12** $^{29}\text{Si}$ NMR

$^{29}\text{Si}$ NMR in  $\text{CDCl}_3$  at 25°C compound 12

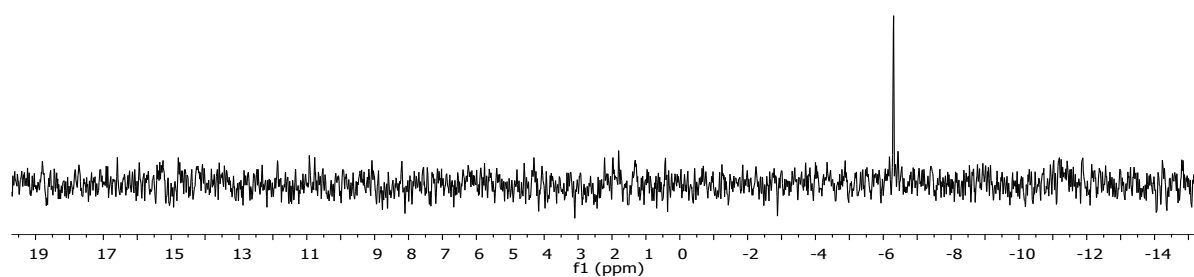

## Compound **13** $^1\text{H}$ NMR

$^1\text{H}$  NMR in  $\text{CDCl}_3$  at 25°C, Compound 13

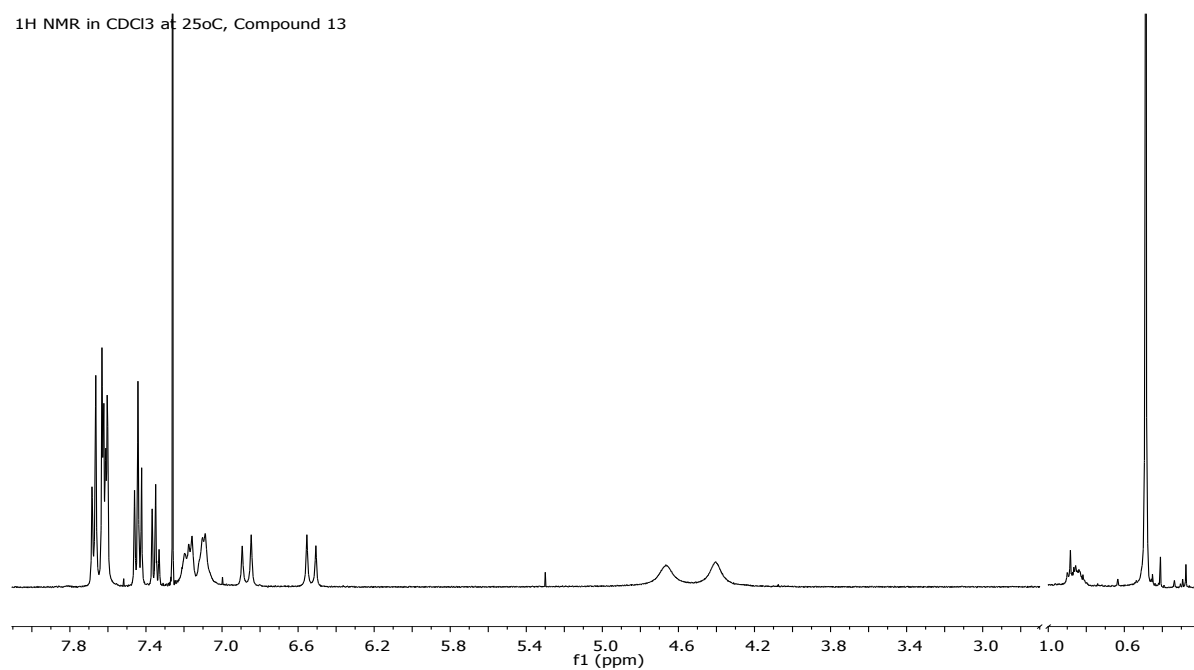

## Compound **13** $^{13}\text{C}$ NMR

$^{13}\text{C}$  NMR in  $\text{CDCl}_3$  at 25°C, Compound 13

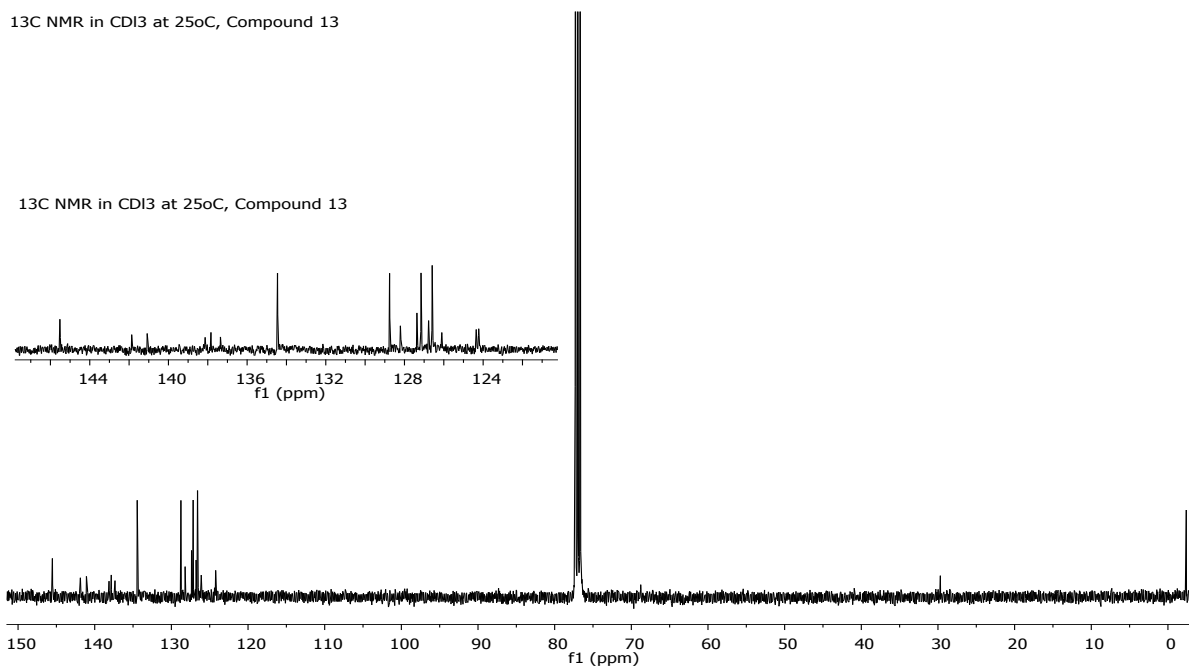

## Compound **13** $^{29}\text{Si}$ NMR

$^{29}\text{Si}$  NMR in  $\text{CDCl}_3$  at 25°C Compound 13

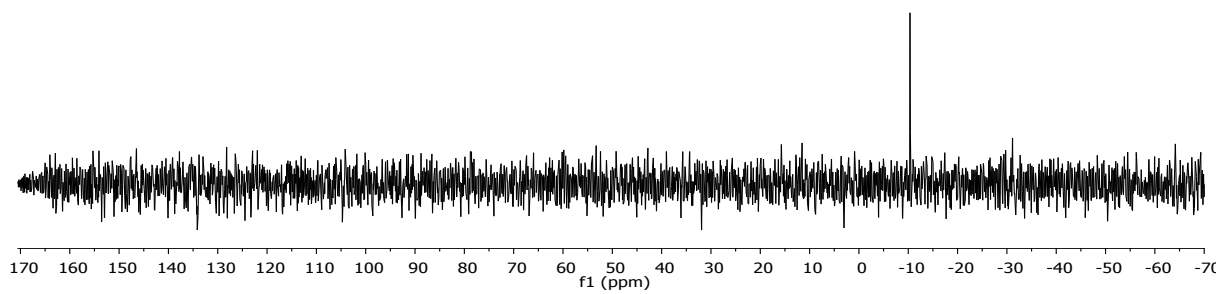

## Compound **14** $^1\text{H}$ NMR

$^1\text{H}$  NMR in  $\text{CDCl}_3$  at 25°C Compound 14

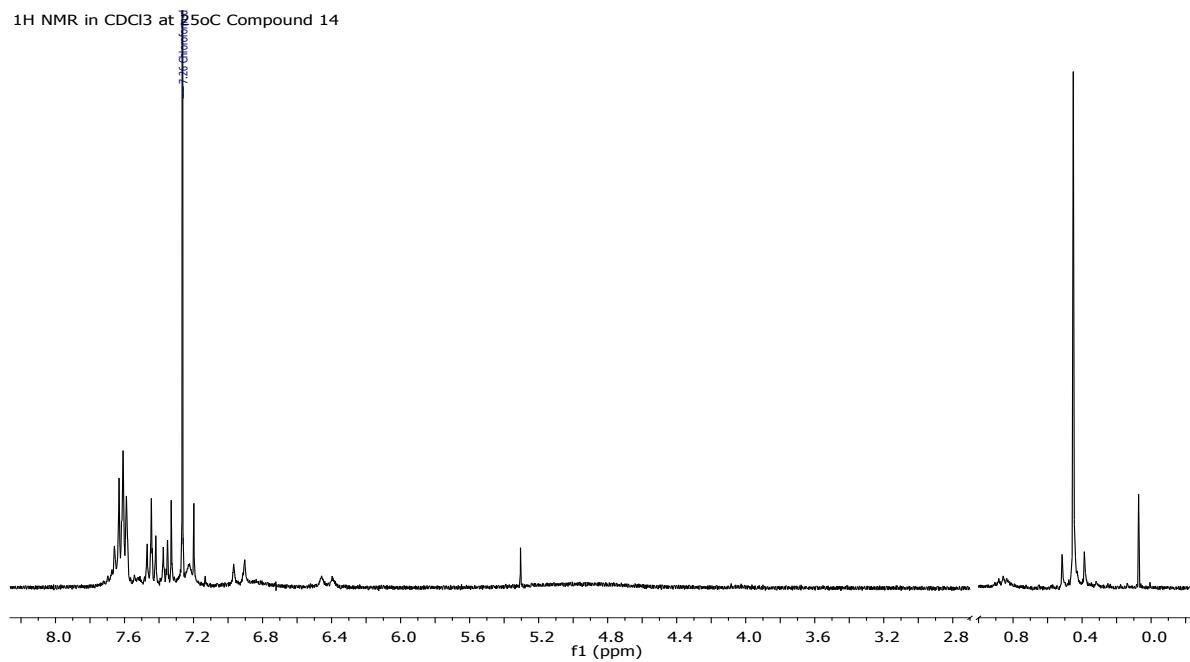

## Compound **14** $^{13}\text{C}$ NMR

$^{13}\text{C}$  NMR in  $\text{CDCl}_3$  at 25°C compound 14

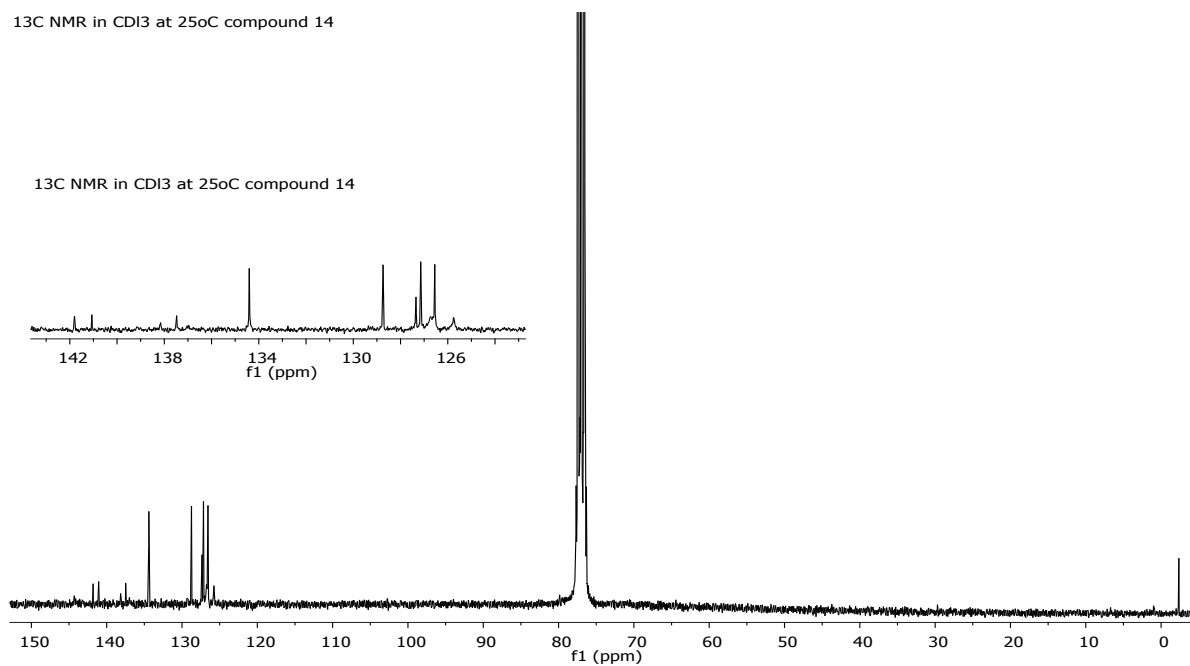

## Compound **14** $^{29}\text{Si}$ NMR

$^{29}\text{Si}$ NMR in  $\text{CDCl}_3$  at 25°C Copomound 14

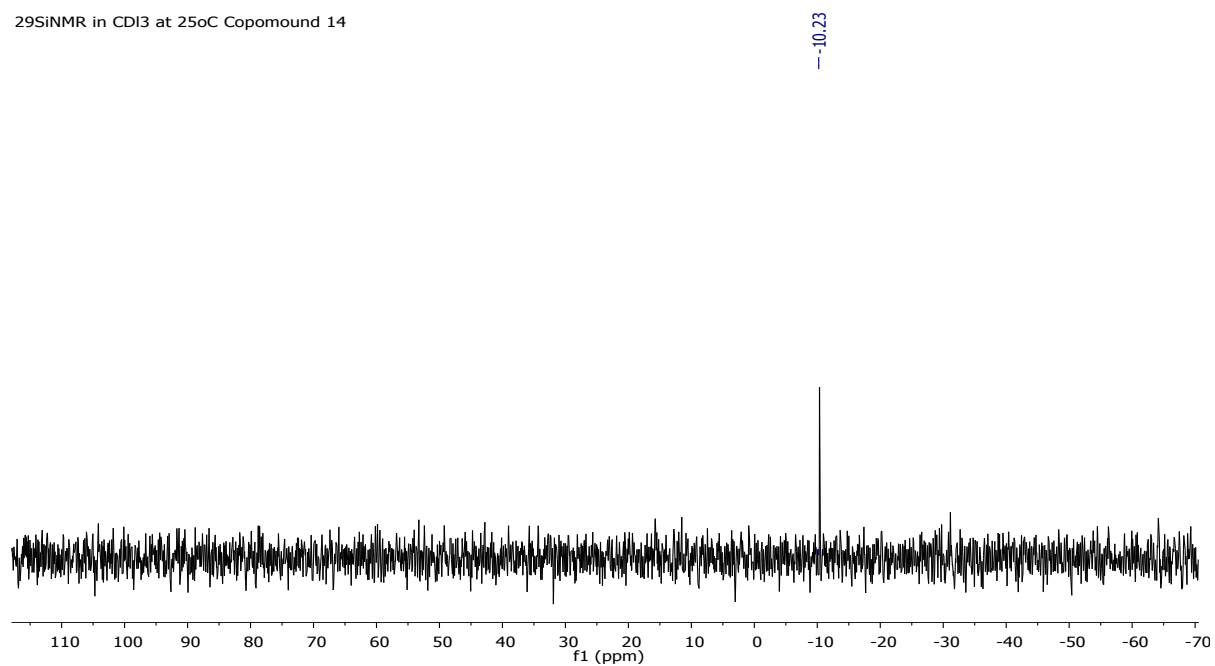

## Polymer **P1** $^1\text{H}$ NMR

Polymer P1  $^1\text{H}$  NMR in  $\text{CDCl}_3$  at 25°C

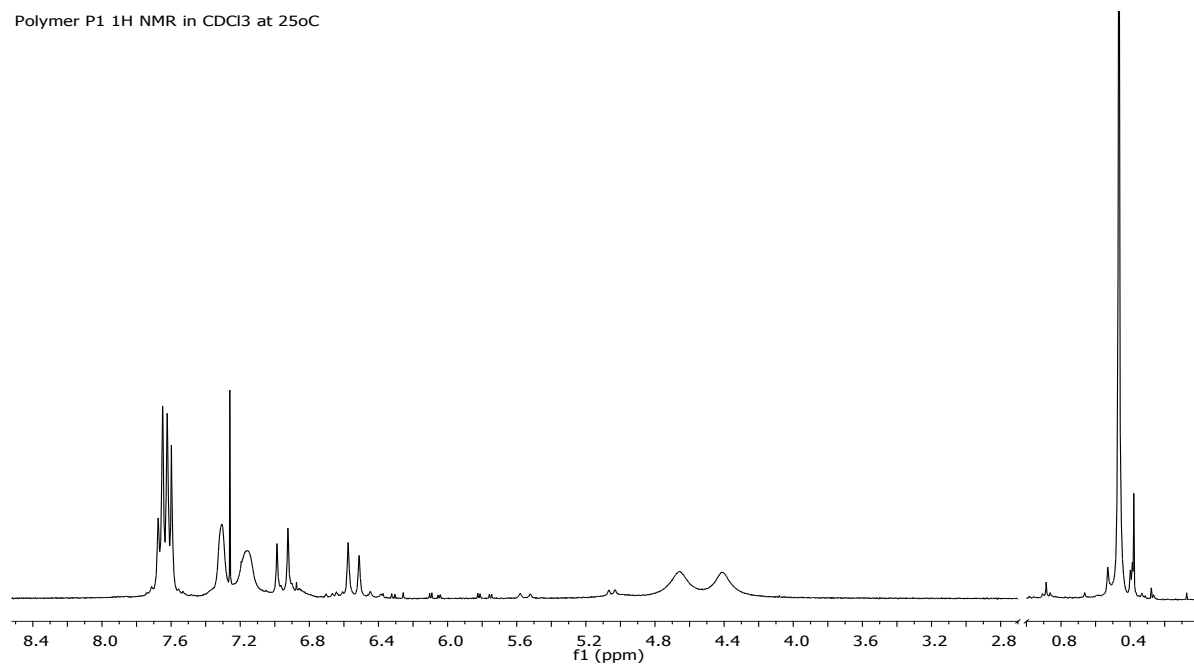



## Polymer P1 $^{13}\text{C}$ NMR

Polymer P1  $^{13}\text{C}$  NMR in  $\text{CDCl}_3$  at 25oC

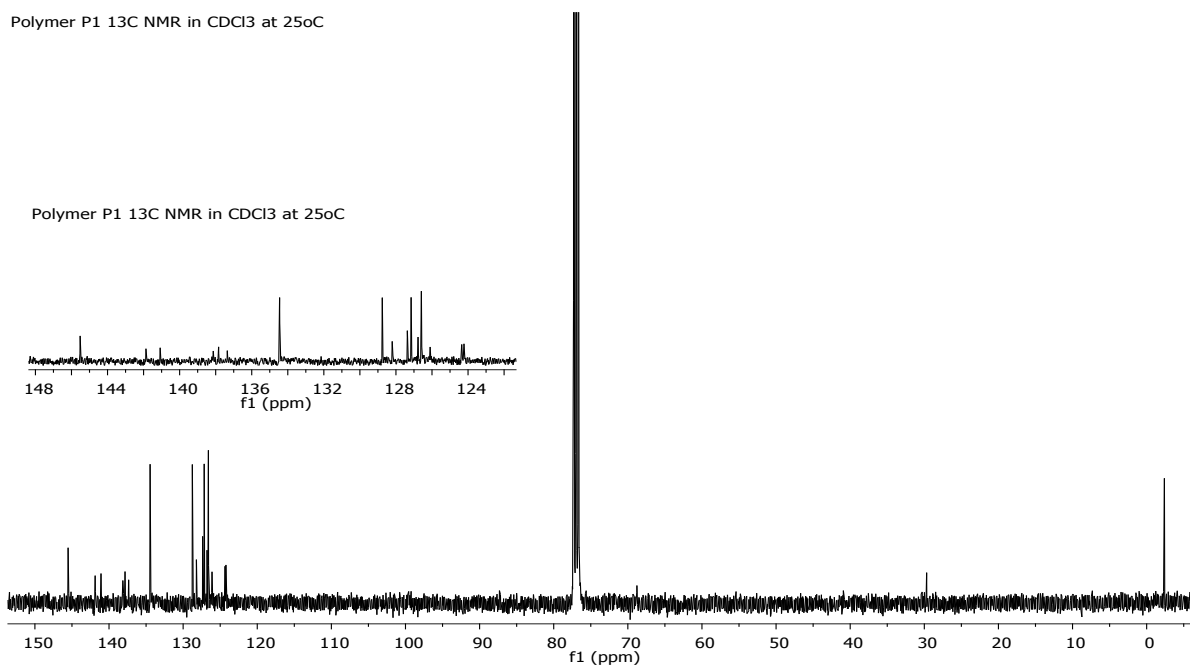

## Polymer P1 $^{29}\text{Si}$ NMR

Polymer P1  $^{29}\text{Si}$  NMR in  $\text{CDCl}_3$  at 25oC

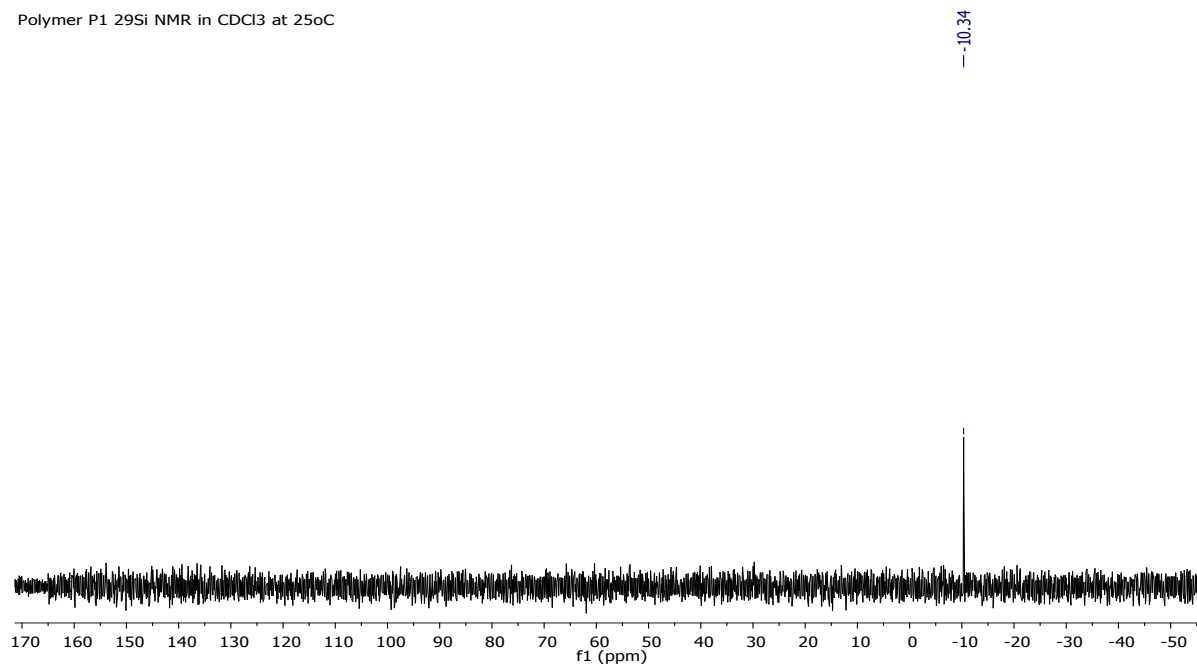

## Polymer P2 $^1\text{H}$ NMR (presence in the Article)

Polymer P2 1H NMR in CDCl<sub>3</sub> at 25oC

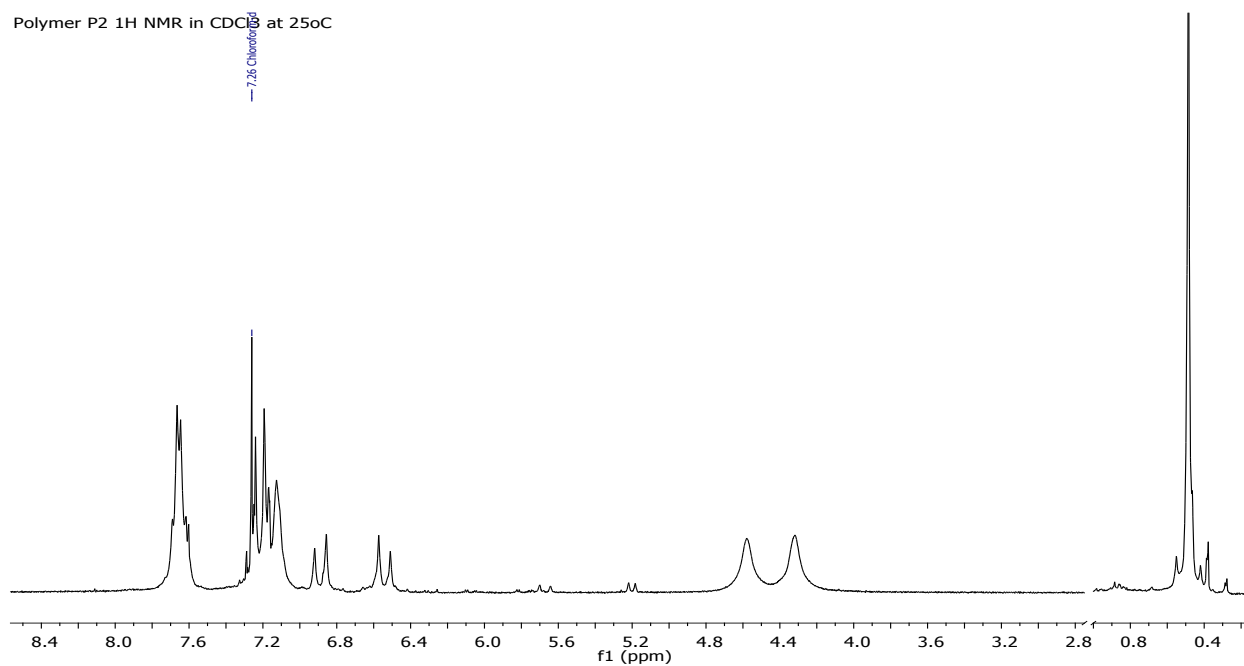

### Polymer P2 <sup>13</sup>C NMR

Polymer P2 13C NMR in CDCl<sub>3</sub> at 25oC

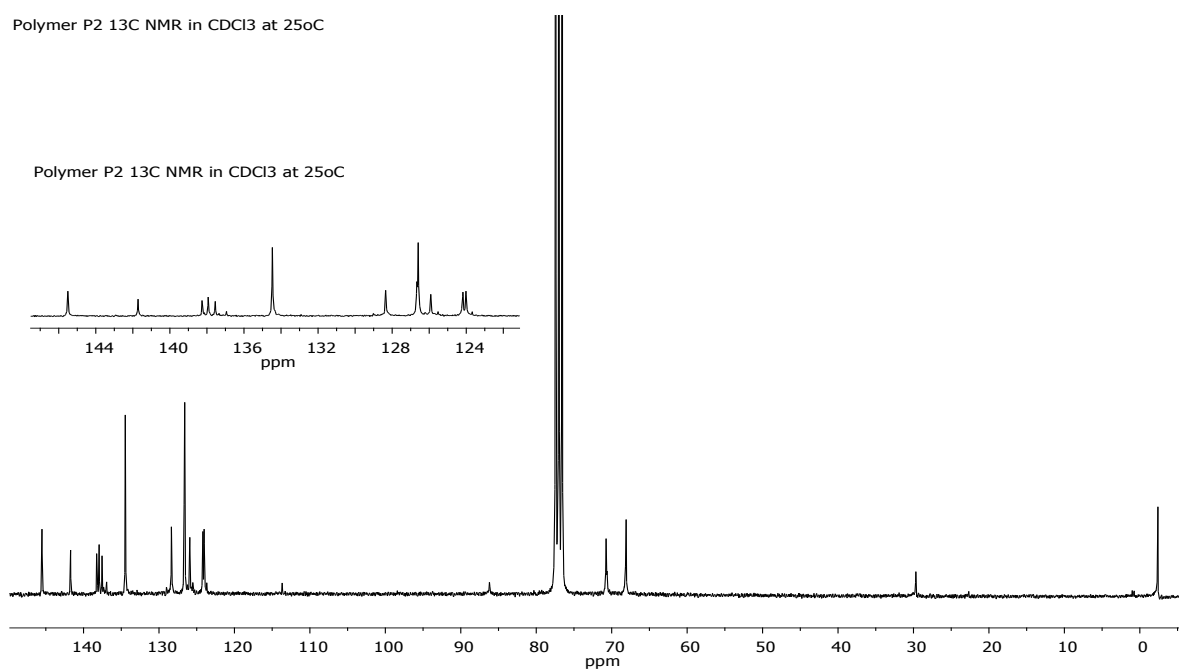

### Polymer P2 <sup>29</sup>Si NMR

Polymer 2 <sup>29</sup>SiNMR in CDCl<sub>3</sub> at 25oC

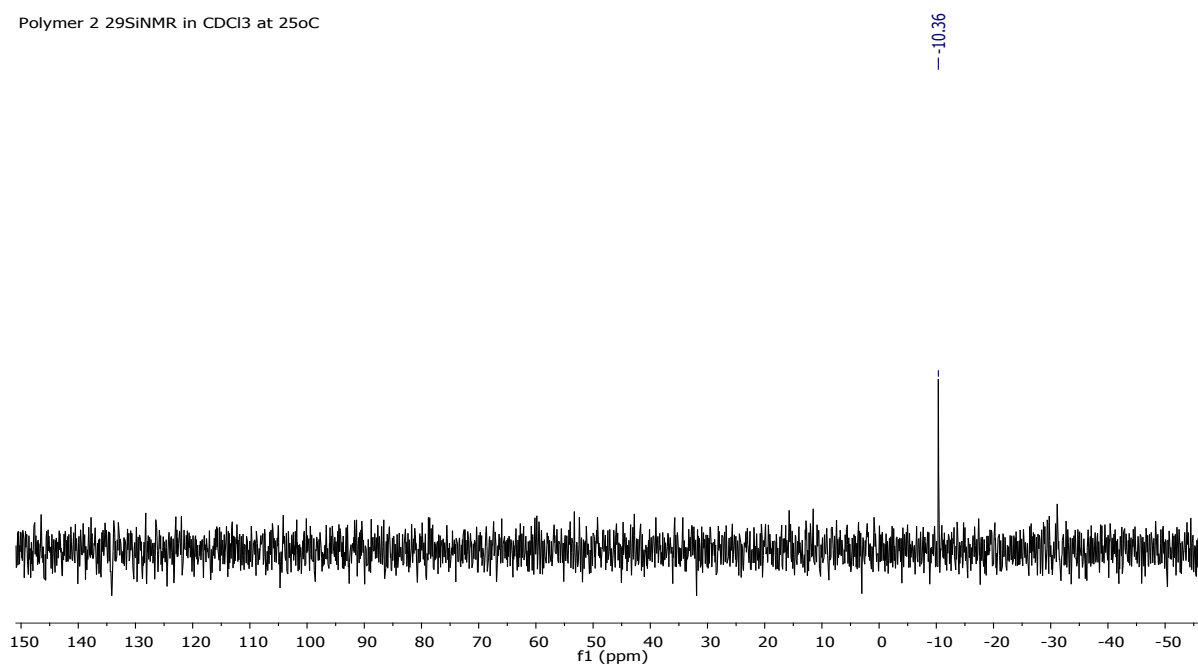

Supplement: c6ra00859c1.pdf [file c6ra00859c1.pdf]
